# Supplementary material
Source: publisher figshare collection journal article supplement (https://frontiersin.figshare.com/ndownloader/files/15014846)
Supplement: Supplementary file [file 15014846]

## Supplementary Materials

Table SUP1: Means, standard deviations, and *N*s for the RIASEC scales of students' occupational interests (Min. = 1; Max. = 5).

|               |        | Mean   | SD      | <i>N</i> |
|---------------|--------|--------|---------|----------|
| Realistic     | male   | 3.2409 | 0.95375 | 5519     |
|               | female | 2.5847 | 0.82097 | 7393     |
|               | total  | 2.8651 | 0.93811 | 12912    |
| Investigative | male   | 3.3006 | 0.86386 | 5519     |
|               | female | 3.0186 | 0.94630 | 7393     |
|               | total  | 3.1391 | 0.92255 | 12912    |
| Artistic      | male   | 2.4158 | 0.85716 | 5519     |
|               | female | 3.1581 | 0.97078 | 7393     |
|               | total  | 2.8408 | 0.99419 | 12912    |
| Social        | male   | 3.2164 | 0.89487 | 5519     |
|               | female | 3.8966 | 0.83702 | 7393     |
|               | total  | 3.6059 | 0.92553 | 12912    |
| Enterprising  | male   | 3.3806 | 0.75266 | 5519     |
|               | female | 3.4204 | 0.73283 | 7393     |
|               | total  | 3.4034 | 0.74161 | 12912    |
| Conventional  | male   | 2.6953 | 0.77319 | 5519     |
|               | female | 2.8238 | 0.78701 | 7393     |
|               | total  | 2.7689 | 0.78369 | 12912    |

Table SUP2: Means, standard errors, and confidence intervals for Figure 3 – Students’ realistic interests (Min. = 1; Max. = 5).

|        |        | Mean  | Standard Error | 95%-Confidence Interval |             |
|--------|--------|-------|----------------|-------------------------|-------------|
|        |        |       |                | Lower Level             | Upper Level |
| STEM-L | male   | 3.655 | 0.014          | 3.627                   | 3.683       |
|        | female | 3.349 | 0.028          | 3.294                   | 3.405       |
| STEM-M | male   | 2.958 | 0.026          | 2.907                   | 3.008       |
|        | female | 2.726 | 0.019          | 2.689                   | 2.762       |
| MED-M  | male   | 2.816 | 0.055          | 2.708                   | 2.923       |
|        | female | 2.526 | 0.036          | 2.455                   | 2.597       |
| ECO-M  | male   | 2.561 | 0.028          | 2.506                   | 2.617       |
|        | female | 2.331 | 0.023          | 2.286                   | 2.376       |
| EDU-H  | male   | 2.535 | 0.067          | 2.405                   | 2.666       |
|        | female | 2.419 | 0.025          | 2.371                   | 2.467       |
| Lang-H | male   | 2.564 | 0.039          | 2.487                   | 2.641       |
|        | female | 2.422 | 0.017          | 2.389                   | 2.456       |

*Note.* STEM-L = STEM subjects with a low proportion of females; STEM-M = STEM subjects with a medium proportion of women; MED-M = medicine (with a moderate proportion of females); ECO-M = economics (with a moderate proportion of females); EDU-H = education (with a high proportion of females); Lang-H = languages (with a high proportion of females).

Table SUP3: Means, standard errors, and confidence intervals for Figure 4 – Students’ social interests (Min. = 1; Max. = 5).

|        |        | Mean  | Standard Error | 95%-Confidence Interval |             |
|--------|--------|-------|----------------|-------------------------|-------------|
|        |        |       |                | Lower Level             | Upper Level |
| STEM-L | male   | 2.975 | 0.014          | 2.948                   | 3.003       |
|        | female | 3.272 | 0.028          | 3.218                   | 3.326       |
| STEM-M | male   | 3.406 | 0.025          | 3.357                   | 3.455       |
|        | female | 3.826 | 0.018          | 3.790                   | 3.861       |
| MED-M  | male   | 4.356 | 0.053          | 4.252                   | 4.460       |
|        | female | 4.557 | 0.035          | 4.488                   | 4.627       |
| ECO-M  | male   | 3.108 | 0.028          | 3.054                   | 3.162       |
|        | female | 3.393 | 0.022          | 3.350                   | 3.437       |
| EDU-H  | male   | 4.359 | 0.065          | 4.233                   | 4.486       |
|        | female | 4.444 | 0.024          | 4.397                   | 4.491       |
| Lang-H | male   | 3.814 | 0.038          | 3.739                   | 3.888       |
|        | female | 4.058 | 0.017          | 4.025                   | 4.090       |

*Note.* STEM-L = STEM subjects with a low proportion of females; STEM-M = STEM subjects with a medium proportion of women; MED-M = medicine (with a moderate proportion of females); ECO-M = economics (with a moderate proportion of females); EDU-H = education (with a high proportion of females); Lang-H = languages (with a high proportion of females).

Table SUP4: Means, standard deviations, and *N*s for the RIASEC scales of the interest profiles of students' occupational aspirations (Min. = 1; Max. = 7).

|               |        | Mean   | <i>SD</i> | <i>N</i> |
|---------------|--------|--------|-----------|----------|
| Realistic     | male   | 3.5682 | 1.88581   | 3877     |
|               | female | 2.3533 | 1.31768   | 5983     |
|               | total  | 2.8310 | 1.67446   | 9860     |
| Investigative | male   | 4.4759 | 1.89344   | 3877     |
|               | female | 3.6487 | 1.61019   | 5983     |
|               | total  | 3.9740 | 1.77367   | 9860     |
| Artistic      | male   | 3.0785 | 1.38235   | 3877     |
|               | female | 3.8271 | 1.27739   | 5983     |
|               | total  | 3.5328 | 1.36932   | 9860     |
| Social        | male   | 3.7695 | 2.37185   | 3877     |
|               | female | 5.6769 | 1.95647   | 5983     |
|               | total  | 4.9269 | 2.32428   | 9860     |
| Enterprising  | male   | 3.7682 | 1.32062   | 3877     |
|               | female | 3.8017 | 1.10274   | 5983     |
|               | total  | 3.7885 | 1.19321   | 9860     |
| Conventional  | male   | 3.8232 | 1.14660   | 3877     |
|               | female | 3.3957 | 0.98727   | 5983     |
|               | total  | 3.5638 | 1.07326   | 9860     |

Table SUP5: Means, standard errors, and confidence intervals for Figure 5 – Students’ occupational aspirations realistic profile (Min. = 1; Max. = 7).

|        |        |       |                | 95%-Confidence Interval |             |
|--------|--------|-------|----------------|-------------------------|-------------|
|        |        | Mean  | Standard Error | Lower Level             | Upper Level |
| STEM-L | male   | 4.726 | 0.027          | 4.673                   | 4.779       |
|        | female | 4.373 | 0.055          | 4.266                   | 4.480       |
| STEM-M | male   | 2.477 | 0.044          | 2.391                   | 2.562       |
|        | female | 2.355 | 0.030          | 2.296                   | 2.414       |
| MED-M  | male   | 4.152 | 0.084          | 3.987                   | 4.316       |
|        | female | 4.166 | 0.056          | 4.056                   | 4.275       |
| ECO-M  | male   | 2.263 | 0.052          | 2.160                   | 2.365       |
|        | female | 2.075 | 0.044          | 1.988                   | 2.161       |
| EDU-H  | male   | 1.873 | 0.109          | 1.658                   | 2.087       |
|        | female | 1.743 | 0.041          | 1.663                   | 1.823       |
| Lang-H | male   | 1.809 | 0.061          | 1.689                   | 1.929       |
|        | female | 1.813 | 0.027          | 1.761                   | 1.866       |

*Note.* STEM-L = STEM subjects with a low proportion of females; STEM-M = STEM subjects with a medium proportion of women; MED-M = medicine (with a moderate proportion of females); ECO-M = economics (with a moderate proportion of females); EDU-H = education (with a high proportion of females); Lang-H = languages (with a high proportion of females).

Table SUP6: Means, standard errors, and confidence intervals for Figure 6 – Students’ occupational aspirations social profile (Min. = 1; Max. = 7).

|        |        | Mean  | Standard Error | 95%-Confidence Interval |             |
|--------|--------|-------|----------------|-------------------------|-------------|
|        |        |       |                | Lower Level             | Upper Level |
| STEM-L | male   | 2.383 | 0.038          | 2.309                   | 2.457       |
|        | female | 2.860 | 0.076          | 2.711                   | 3.009       |
| STEM-M | male   | 5.389 | 0.061          | 5.269                   | 5.508       |
|        | female | 5.974 | 0.042          | 5.891                   | 6.057       |
| MED-M  | male   | 5.550 | 0.117          | 5.321                   | 5.779       |
|        | female | 5.570 | 0.078          | 5.417                   | 5.723       |
| ECO-M  | male   | 3.421 | 0.073          | 3.279                   | 3.563       |
|        | female | 3.877 | 0.061          | 3.757                   | 3.997       |
| EDU-H  | male   | 6.403 | 0.152          | 6.105                   | 6.701       |
|        | female | 6.442 | 0.057          | 6.330                   | 6.553       |
| Lang-H | male   | 6.394 | 0.085          | 6.228                   | 6.561       |
|        | female | 6.489 | 0.037          | 6.415                   | 6.562       |

*Note.* STEM-L = STEM subjects with a low proportion of females; STEM-M = STEM subjects with a medium proportion of women; MED-M = medicine (with a moderate proportion of females); ECO-M = economics (with a moderate proportion of females); EDU-H = education (with a high proportion of females); Lang-H = languages (with a high proportion of females).

Table SUP7: Means, standard errors, and confidence intervals for Figure 7 – Students’ realistic interests in STEM-L for the different subject groups: IEC = Industrial Engineering, focus on economics; CS = Computer Science; PHY = Physics, Astronomy; ENG = Engineering, general; ME = Mechanical Engineering; EE = Electrical Engineering; TE = Traffic Engineering; CE = Civil Engineering; IEE = Industrial Engineering, focus on engineering

|     |        |       |                | 95%-Confidence Interval |             |
|-----|--------|-------|----------------|-------------------------|-------------|
|     |        | Mean  | Standard Error | Lower Level             | Upper Level |
| IEC | male   | 3.563 | 0.039          | 3.488                   | 3.639       |
|     | female | 3.359 | 0.074          | 3.214                   | 3.504       |
| CS  | male   | 3.054 | 0.032          | 2.992                   | 3.116       |
|     | female | 2.932 | 0.060          | 2.814                   | 3.050       |
| PHY | male   | 3.251 | 0.051          | 3.151                   | 3.350       |
|     | female | 3.051 | 0.082          | 2.890                   | 3.212       |
| ENG | male   | 4.056 | 0.057          | 3.945                   | 4.167       |
|     | female | 4.089 | 0.195          | 3.706                   | 4.472       |
| ME  | male   | 4.025 | 0.025          | 3.976                   | 4.074       |
|     | female | 3.511 | 0.053          | 3.408                   | 3.615       |
| EE  | male   | 3.655 | 0.042          | 3.573                   | 3.736       |
|     | female | 3.765 | 0.130          | 3.510                   | 4.019       |
| TE  | male   | 3.846 | 0.086          | 3.678                   | 4.014       |
|     | female | 3.391 | 0.140          | 3.115                   | 3.666       |
| CE  | male   | 3.968 | 0.053          | 3.863                   | 4.073       |
|     | female | 3.739 | 0.075          | 3.592                   | 3.885       |
| IEE | male   | 3.499 | 0.062          | 3.377                   | 3.620       |
|     | female | 3.190 | 0.117          | 2.962                   | 3.419       |

Table SUP8: Means, standard errors, and confidence intervals for Figure 8 – Students’ social interests in STEM-L for the different subject groups: IEC = Industrial Engineering, focus on economics; CS = Computer Science; PHY = Physics, Astronomy; ENG = Engineering, general; ME = Mechanical Engineering; EE = Electrical Engineering; TE = Traffic Engineering; CE = Civil Engineering; IEE = Industrial Engineering, focus on engineering

|     |        |       |                | 95%-Confidence Interval |             |
|-----|--------|-------|----------------|-------------------------|-------------|
|     |        | Mean  | Standard Error | Lower Level             | Upper Level |
| IEC | male   | 3.043 | 0.043          | 2.959                   | 3.126       |
|     | female | 3.183 | 0.082          | 3.022                   | 3.343       |
| CS  | male   | 2.967 | 0.035          | 2.898                   | 3.036       |
|     | female | 3.261 | 0.067          | 3.130                   | 3.392       |
| PHY | male   | 3.129 | 0.056          | 3.019                   | 3.239       |
|     | female | 3.420 | 0.091          | 3.242                   | 3.597       |
| ENG | male   | 2.985 | 0.062          | 2.863                   | 3.108       |
|     | female | 3.400 | 0.216          | 2.977                   | 3.823       |
| ME  | male   | 2.940 | 0.027          | 2.886                   | 2.994       |
|     | female | 3.204 | 0.059          | 3.089                   | 3.319       |
| EE  | male   | 2.904 | 0.046          | 2.814                   | 2.995       |
|     | female | 3.480 | 0.143          | 3.200                   | 3.761       |
| TE  | male   | 2.996 | 0.095          | 2.810                   | 3.181       |
|     | female | 3.218 | 0.155          | 2.914                   | 3.523       |
| CE  | male   | 3.008 | 0.059          | 2.893                   | 3.124       |
|     | female | 3.418 | 0.083          | 3.256                   | 3.580       |
| IEE | male   | 2.944 | 0.068          | 2.810                   | 3.078       |
|     | female | 3.063 | 0.129          | 2.811                   | 3.316       |



Table SUP9: Means, standard errors, and confidence intervals for Figure 9 – Congruence (lowest congruence = 4; highest congruence = 0).

|        |        | Mean  | Standard Error | 95%-Confidence Interval |             |
|--------|--------|-------|----------------|-------------------------|-------------|
|        |        |       |                | Lower Level             | Upper Level |
| STEM-L | male   | 0.941 | 0.007          | 0.927                   | 0.954       |
|        | female | 0.963 | 0.014          | 0.936                   | 0.991       |
| STEM-M | male   | 0.973 | 0.011          | 0.951                   | 0.995       |
|        | female | 0.872 | 0.008          | 0.856                   | 0.887       |
| MED-M  | male   | 0.648 | 0.021          | 0.606                   | 0.690       |
|        | female | 0.715 | 0.014          | 0.687                   | 0.743       |
| ECO-M  | male   | 0.842 | 0.013          | 0.816                   | 0.868       |
|        | female | 0.846 | 0.011          | 0.824                   | 0.868       |
| EDU-H  | male   | 0.678 | 0.028          | 0.623                   | 0.733       |
|        | female | 0.657 | 0.010          | 0.637                   | 0.678       |
| Lang-H | male   | 0.777 | 0.016          | 0.746                   | 0.807       |
|        | female | 0.666 | 0.007          | 0.653                   | 0.680       |

*Note.* STEM-L = STEM subjects with a low proportion of females; STEM-M = STEM subjects with a medium proportion of women; MED-M = medicine (with a moderate proportion of females); ECO-M = economics (with a moderate proportion of females); EDU-H = education (with a high proportion of females); Lang-H = languages (with a high proportion of females).

Table SUP10: Means, standard errors, and confidence intervals for Figure 10 – Congruence in STEM-L for the different subject groups: IEC = Industrial Engineering, focus on economics; CS = Computer Science; PHY = Physics, Astronomy; ENG = Engineering, general; ME = Mechanical Engineering; EE = Electrical Engineering; TE = Traffic Engineering; CE = Civil Engineering; IEE = Industrial Engineering, focus on engineering

|      |        |       |                | 95%-Confidence Interval |             |
|------|--------|-------|----------------|-------------------------|-------------|
| Mean |        |       | Standard Error | Lower Level             | Upper Level |
| IEC  | male   | 0.890 | 0.021          | 0.849                   | 0.930       |
|      | female | 0.892 | 0.044          | 0.806                   | 0.978       |
| CS   | male   | 0.894 | 0.016          | 0.863                   | 0.924       |
|      | female | 0.883 | 0.031          | 0.821                   | 0.945       |
| PHY  | male   | 0.962 | 0.027          | 0.910                   | 1.015       |
|      | female | 0.874 | 0.040          | 0.796                   | 0.952       |
| ENG  | male   | 0.964 | 0.034          | 0.898                   | 1.030       |
|      | female | 1.106 | 0.143          | 0.826                   | 1.386       |
| ME   | male   | 0.932 | 0.014          | 0.904                   | 0.959       |
|      | female | 0.957 | 0.030          | 0.898                   | 1.016       |
| EE   | male   | 0.999 | 0.022          | 0.957                   | 1.042       |
|      | female | 1.168 | 0.077          | 1.016                   | 1.320       |
| TE   | male   | 0.929 | 0.049          | 0.832                   | 1.025       |
|      | female | 1.157 | 0.080          | 1.001                   | 1.313       |
| CE   | male   | 1.065 | 0.025          | 1.015                   | 1.114       |
|      | female | 1.109 | 0.037          | 1.036                   | 1.183       |
| IEE  | male   | 0.923 | 0.035          | 0.855                   | 0.991       |
|      | female | 0.999 | 0.067          | 0.869                   | 1.130       |

Table SUP11: Means, standard errors, and confidence intervals for students' enterprising interests (Min. = 1; Max. = 5).

|        |        | Mean  | Standard Error | 95%-Confidence Interval |             |
|--------|--------|-------|----------------|-------------------------|-------------|
|        |        |       |                | Lower Level             | Upper Level |
| STEM-L | male   | 3.252 | 0.013          | 3.227                   | 3.278       |
|        | female | 3.145 | 0.026          | 3.094                   | 3.196       |
| STEM-M | male   | 3.346 | 0.023          | 3.300                   | 3.392       |
|        | female | 3.277 | 0.017          | 3.243                   | 3.310       |
| MED-M  | male   | 3.381 | 0.050          | 3.283                   | 3.479       |
|        | female | 3.306 | 0.033          | 3.241                   | 3.371       |
| ECO-M  | male   | 3.787 | 0.026          | 3.737                   | 3.838       |
|        | female | 3.632 | 0.021          | 3.591                   | 3.673       |
| EDU-H  | male   | 3.592 | 0.061          | 3.473                   | 3.710       |
|        | female | 3.477 | 0.022          | 3.433                   | 3.521       |
| Lang-H | male   | 3.578 | 0.036          | 3.508                   | 3.648       |
|        | female | 3.525 | 0.016          | 3.494                   | 3.556       |

*Note.* STEM-L = STEM subjects with a low proportion of females; STEM-M = STEM subjects with a medium proportion of women; MED-M = medicine (with a moderate proportion of females); ECO-M = economics (with a moderate proportion of females); EDU-H = education (with a high proportion of females); Lang-H = languages (with a high proportion of females).

Table SUP12: Means, standard errors, and confidence intervals for students' conventional interests (Min. = 1; Max. = 5).

|        |        | Mean  | Standard Error | 95%-Confidence Interval |             |
|--------|--------|-------|----------------|-------------------------|-------------|
|        |        |       |                | Lower Level             | Upper Level |
| STEM-L | male   | 2.652 | 0.014          | 2.625                   | 2.680       |
|        | female | 2.866 | 0.028          | 2.812                   | 2.921       |
| STEM-M | male   | 2.797 | 0.025          | 2.748                   | 2.846       |
|        | female | 2.894 | 0.018          | 2.858                   | 2.929       |
| MED-M  | male   | 2.322 | 0.053          | 2.217                   | 2.427       |
|        | female | 2.478 | 0.035          | 2.408                   | 2.547       |
| ECO-M  | male   | 2.897 | 0.028          | 2.843                   | 2.951       |
|        | female | 3.027 | 0.022          | 2.984                   | 3.071       |
| EDU-H  | male   | 2.498 | 0.065          | 2.371                   | 2.624       |
|        | female | 2.637 | 0.024          | 2.590                   | 2.684       |
| Lang-H | male   | 2.654 | 0.038          | 2.579                   | 2.728       |
|        | female | 2.803 | 0.017          | 2.770                   | 2.835       |
